# Supplementary material for: Fanconi anemia protein FANCD2 is activated by AICAR, a modulator of AMPK and cellular energy metabolism
Source: PubMed Central journal article supplement (PMC5292659; doi:10.1002/2211-5463.12185), 2017-01-09
Supplement: FEB4-7-284-s001.pdf [file FEB4-7-284-s001.pdf]

A

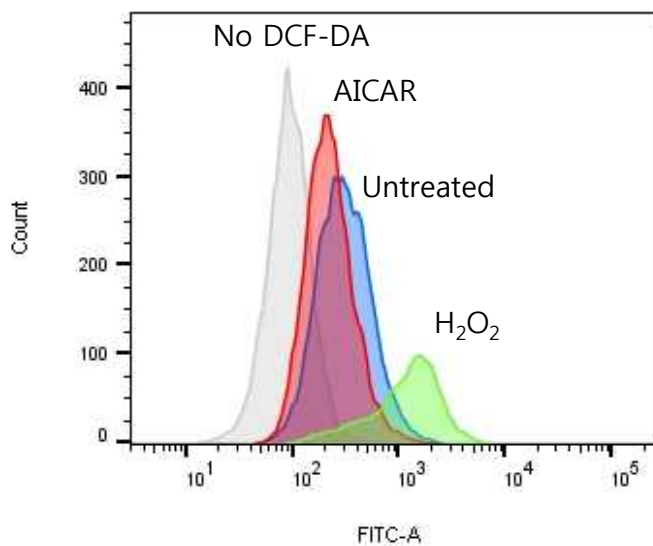

B

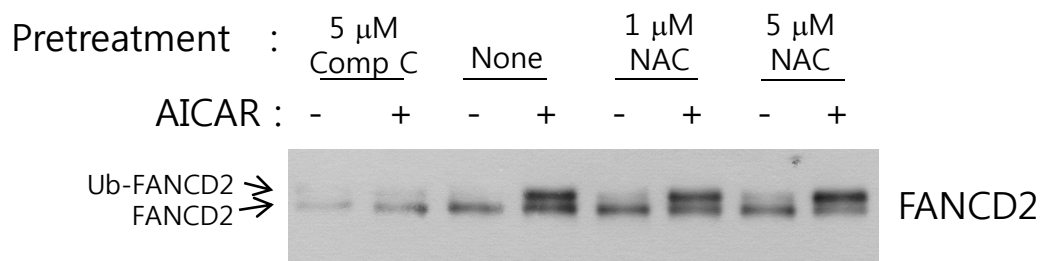

**Supplementary Figure 1. AICAR-induced FANCD2 monoubiquitination does not involve generation of reactive oxygen species (ROS).** *A. ROS is not generated after AICAR treatments in normal fibroblasts.* Cells were treated with 0.25 mM AICAR for 24 h, stained with DCF-DA and analysed by flow cytometry. Data from AICAR-treated sample (red) are superimposed with untreated, control (blue) and unstained control (grey). In the right graph, H<sub>2</sub>O<sub>2</sub>-treated samples were included as a positive control. *B. Pretreatment with ROS scavenger, N-acetylcystein (NAC), does not affect the AICAR-induced FANCD2 monoubiquitination.* Caki-1 cells were pretreated with Compound C (Comp C) or NAC 1 h before AICAR treatment for 24 h. Cell lysates were subjected to immunoblotting with FANCD2.
